# Supplementary material
Source: publisher site journal article supplement (https://www.dovepress.com/article/562959)
Supplement: Supplementary file 1 [file Supplementary_Table_S1.docx]

**Table S1.** A comparison of nanoplatforms used in treatment for multiple autoimmune diseases.

| **Nanopaticles type** | **Composition and structure layout** | **Biocompatibility** | **Targeting approach** | **Therapeutic benefits** | **Limitations** | **Applications and References** |
| --- | --- | --- | --- | --- | --- | --- |
| PLGA, PEG-PLA, chitosan | Biodegradable synthetic or natural polymers | High; FDA-approved (PLGA, PEG) | Targeting can be passive via the EPR effect or active through ligand/antibody functionalization Provides controlled drug release | Controlled drug release, stability, tunable size and charge, approved materials | When scaling up a range of challenges emerges, including the potential for a release | Methotrexate-PLGA for RA; siRNA-PLGA for arthritis 1,2 |
| Liposomes | Vesicles built from a phospholipid bilayer that enclose an interior | Excellent; mimic cell membranes | Passive accumulation; active targeting accomplished by modifying the ligand | Able to encapsulate both hydrophilic and hydrophobic drugs; it also boasts low toxicity | Short half-life; unstable in storage | Liposomal methylprednisolone for MS; Tacrolimus liposomes for psoriasis 3,4 |
| SLNs | Lipid core stabilized by surfactants | Good; biodegradable lipids | The design exploits targeting while its surfactant remains adoptable for active targeting | Equipped with a drug payload it remains steadfastly stable and vigilantly shield the drug from any form of degradation | Limited hydrophilic drug loading; polymorphic transitions | Triptolide-SLN for RA and psoriasis 5 |
| Micelles (designed from polymers or derived from lipid) | Amphiphilic copolymers that self-assemble into core-shell nanostructure | High; depends on polymer type | Passive targeting; can add targeting ligands | Enhance how readily hydrophobic drugs dissolve, paving the way, for tissue penetration | The drug tends to release and its stability in vivo is limited | Methotrexate micelles for RA 6 |
| Exosomes / Exosome-like nanoparticles | Natural vesicles or synthetic mimics usually range from 30nm to 150nm | Excellent; minimal immunogenicity | Natural homing to immune and inflamed cells | Low toxicity, intrinsic targeting, cross biological barriers | Securing an isolation was tricky; scaling the system introduced a host of new challenges | Derived plant exosome NPs for IBD; MOG exosomes for MS 7,8 |
| SPIONs | Iron oxide core coated with PEG or dextran | Moderate to high; the exact level depends on the coating | Magnetic guidance by fields or targeting with antibodies | Empower simultaneous MRI visualization and therapeutic drug administration; the payload is released in the targeted site | There is a possibility of ROS formation accompanied by the risk that it may accumulate in organs | SPION-based delivery for RA and MS 9 |
| AuNPs | Metallic gold core with surface coatings | Good; inert and stable | Passive accumulation; ligand-mediated targeting | Easy functionalization; optical and photothermal properties | Non-biodegradable; there is a risk to pile up and turn poisonous | AuNPs for the management of autoimmune encephalomyelitis 10 |
| Hydrogels / Nanogels | Cross-linked, water-affine polymer networks | Exceptionally good, boasting both biocompatibility and tunability | Local injection providing release either, via degradation or a stimulus-responsive mechanism | Prolonged release, high loading, responsive design | Because the formulation is so intricate its systemic use is quite limited | Dexamethasone nanogel for SLE 11 |
| LNPs | An ionizable lipid combined with helper lipids all surrounding by a shell | High; already used in clinical setting, for mRNA delivery | Breaking out of the endosome. Getting mRNA or siRNA into the cell’s cytoplasm | Effective gene delivery; a platform that scales with ease; immune targeting is effective | Cold-chain storage; lipid toxicity could be a concern | siRNA-LNP for RA; mRNA-LNP for MS tolerance induction 12,13 |

**References**

1. Présumey J, Salzano G, Courties G, et al. PLGA microspheres encapsulating siRNA anti-TNFalpha: efficient RNAi-mediated treatment of arthritic joints. 2012;82(3):457-464.

2. Wu Z, Xu K, Min J, et al. Folate-conjugated hydrophobicity modified glycol chitosan nanoparticles for targeted delivery of methotrexate in rheumatoid arthritis. 2020;18:2280800020962629.

3. Gaillard PJ, Appeldoorn CC, Rip J, et al. Enhanced brain delivery of liposomal methylprednisolone improved therapeutic efficacy in a model of neuroinflammation. 2012;164(3):364-369.

4. Jindal S, Awasthi R, Singhare D, Kulkarni GTJMh. Topical delivery of Tacrolimus using liposome containing gel: An emerging and synergistic approach in management of psoriasis. 2020;142:109838.

5. Musthaba S, Ahmad S, Ahuja A, Ali J, Baboota SJCN. Nano approaches to enhance pharmacokinetic and pharmacodynamic activity of plant origin drugs. 2009;5(3):344-352.

6. Wang Y, Liu Z, Li T, et al. Enhanced therapeutic effect of RGD-modified polymeric micelles loaded with low-dose methotrexate and nimesulide on rheumatoid arthritis. 2019;9(3):708.

7. Li D-f, Tang Q, Yang M-f, et al. Plant-derived exosomal nanoparticles: potential therapeutic for inflammatory bowel disease. 2023;5(14):3575-3588.

8. Galazka G, Mycko MP, Selmaj I, Raine CS, Selmaj KWJMSJ. Multiple sclerosis: Serum-derived exosomes express myelin proteins. 2018;24(4):449-458.

9. Almeida AF, Miranda MS, Reis RL, Gomes ME, Rodrigues MTJIJoMS. Using hybrid nanoplatforms to combine traditional anti-inflammatory drug delivery with RNA-based therapeutics for macrophage reprograming. 2024;25(19):10693.

10. Aghaie T, Jazayeri MH, Avan A, Anissian A, Salari AAJIl. Gold nanoparticles and polyethylene glycol alleviate clinical symptoms and alter cytokine secretion in a mouse model of experimental autoimmune encephalomyelitis. 2019;71(9):1313-1321.

11. Zhu H, Huang D, Nie M, Zhao Y, Sun LJBM. Dexamethasone loaded DNA scavenger nanogel for systemic lupus erythematosus treatment. 2025;43:330-339.

12. Feng Y, Pan X, Li Z, et al. Innovative Lipid Nanoparticles Co-Delivering Hydroxychloroquine and siRNA for Enhanced Rheumatoid Arthritis Therapy. 2025;17(1):45.

13. Melamed JR, Muscat-Rivera J, Kegel M, et al. Anionic lipids modulate mRNA-lipid nanoparticle immunogenicity and confer protection in a mouse model of multiple sclerosis. 2025:2025.2010. 2017.683125.
